# Supplementary material for: Association of TILs with clinical parameters, Recurrence Score® results, and prognosis in patients with early HER2-negative breast cancer (BC)—a translational analysis of the prospective WSG PlanB trial
Source: Springer Nature journal article supplement (doi:10.1186/s13058-020-01283-w), 2020-05-14

Supp Figure 3

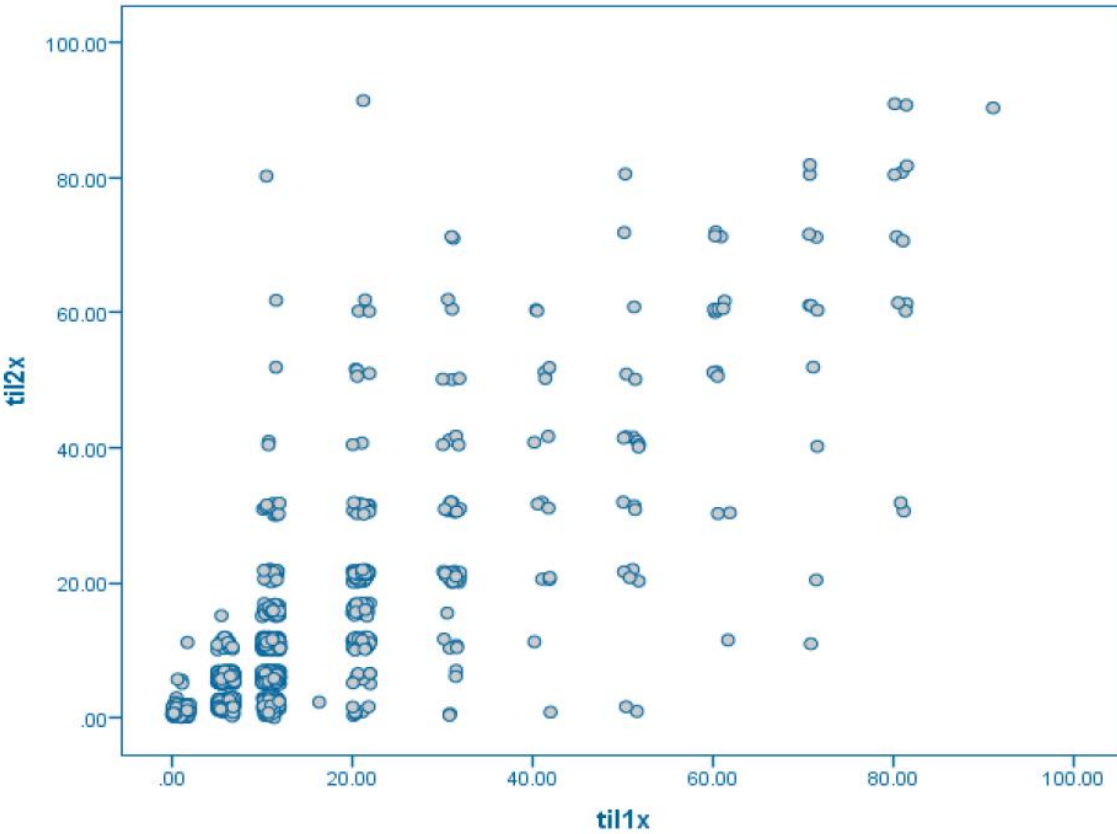

Supplement: MOESM3 [file 17983928]
